# Supplementary material for: AutodiDAQt: Simple Scientific Data Acquisition Software with Analysis-in-the-Loop
Source: MDPI journal article supplement (doi:10.3390/software2010005), 2023-02-18
Supplement: s1 [file s1]

Archive with 1 entries (1 files):
- software-2114663-supplementary.pdf
